# Supplementary material
Source: PubMed Central journal article supplement (PMC3242722)
Supplement: supp_blood-2011-08-371849_Document1.pdf [file supp_blood-2011-08-371849_Document1.pdf]

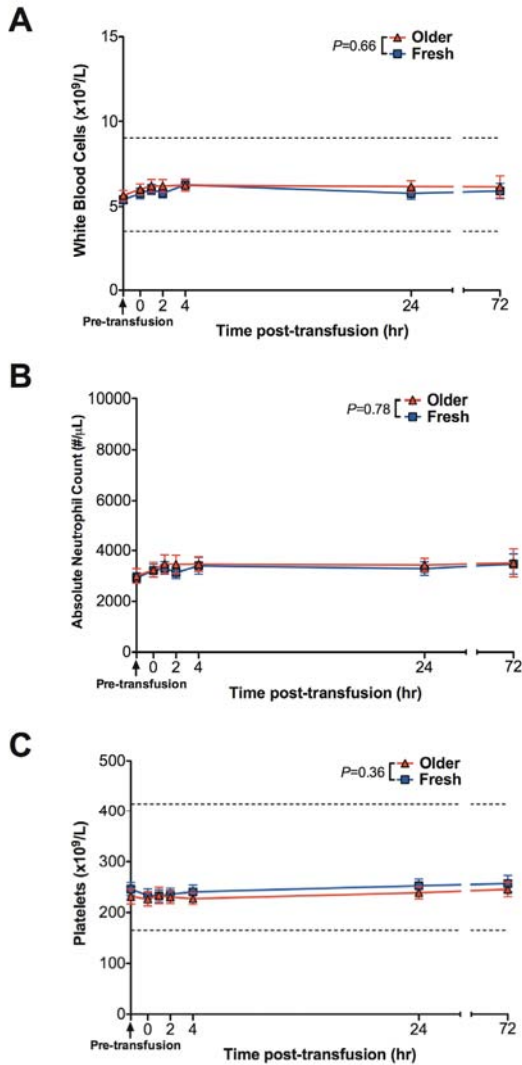

**Figure S1. Complete blood counts in healthy human volunteers after single unit transfusions of fresh or older red blood cells**

The mean  $\pm$  SEM for (A) white blood cell, (B) absolute neutrophil, and (C) platelet counts from pre-transfusion to 72-hours post-transfusion in volunteers transfused with either fresh or older red blood cells. Vertical arrows denote pre-transfusion time points and horizontal dashed lines represent reference range values. The  $P$  value is as specified comparing the paired area under the curve of the means of the outcome parameters for the  $N=14$  volunteers from 0- to 24-hours after the fresh and older transfusions.

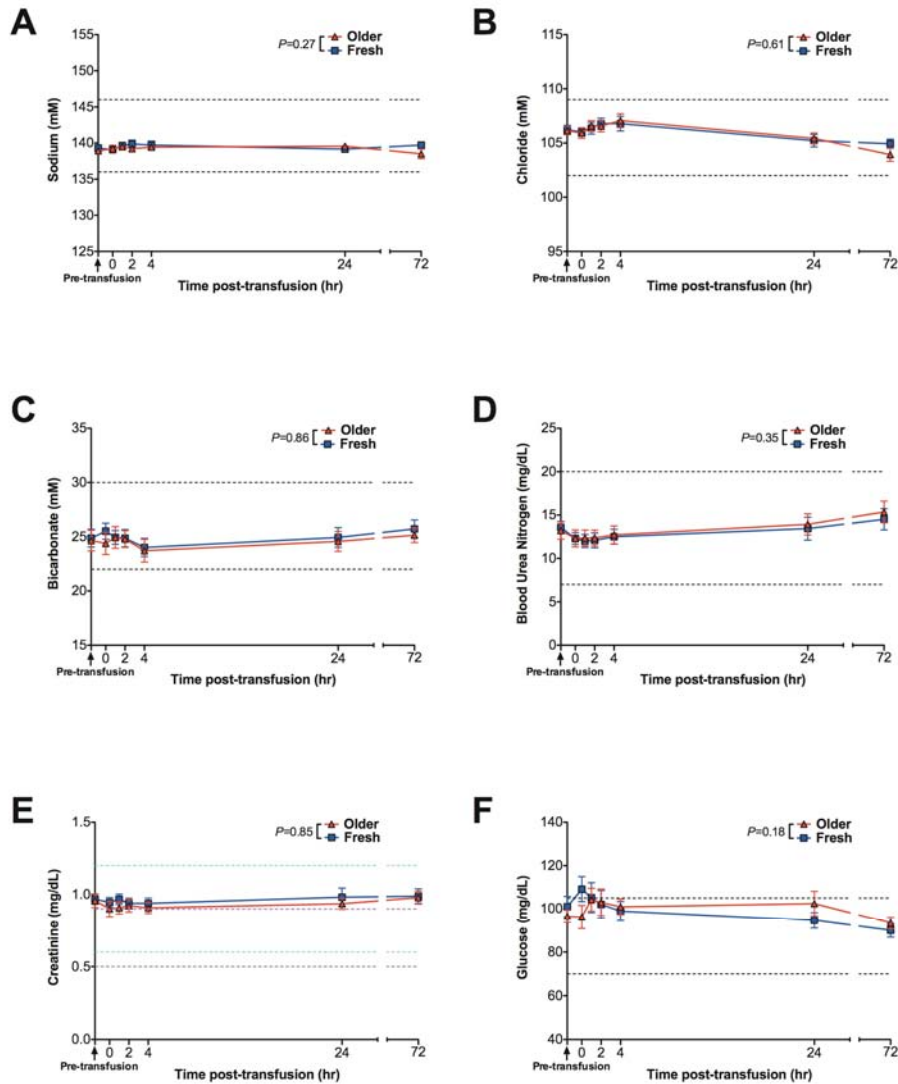

**Figure S2. Basic metabolic parameters in healthy human volunteers after single unit transfusions of fresh or older red blood cells**

The mean  $\pm$  SEM for serum (A) sodium, (B) chloride, (C) bicarbonate, (D) blood urea nitrogen, (E) creatinine, and (F) glucose from pre-transfusion to 72-hours post-transfusion in volunteers transfused with either fresh or older red blood cells. Vertical arrows denote pre-transfusion time points and horizontal dashed lines represent reference range values. The *P* value is as specified comparing the paired area under the curve of the means of the outcome parameters for the N=14 volunteers from 0- to 24-hours after the fresh and older transfusions.

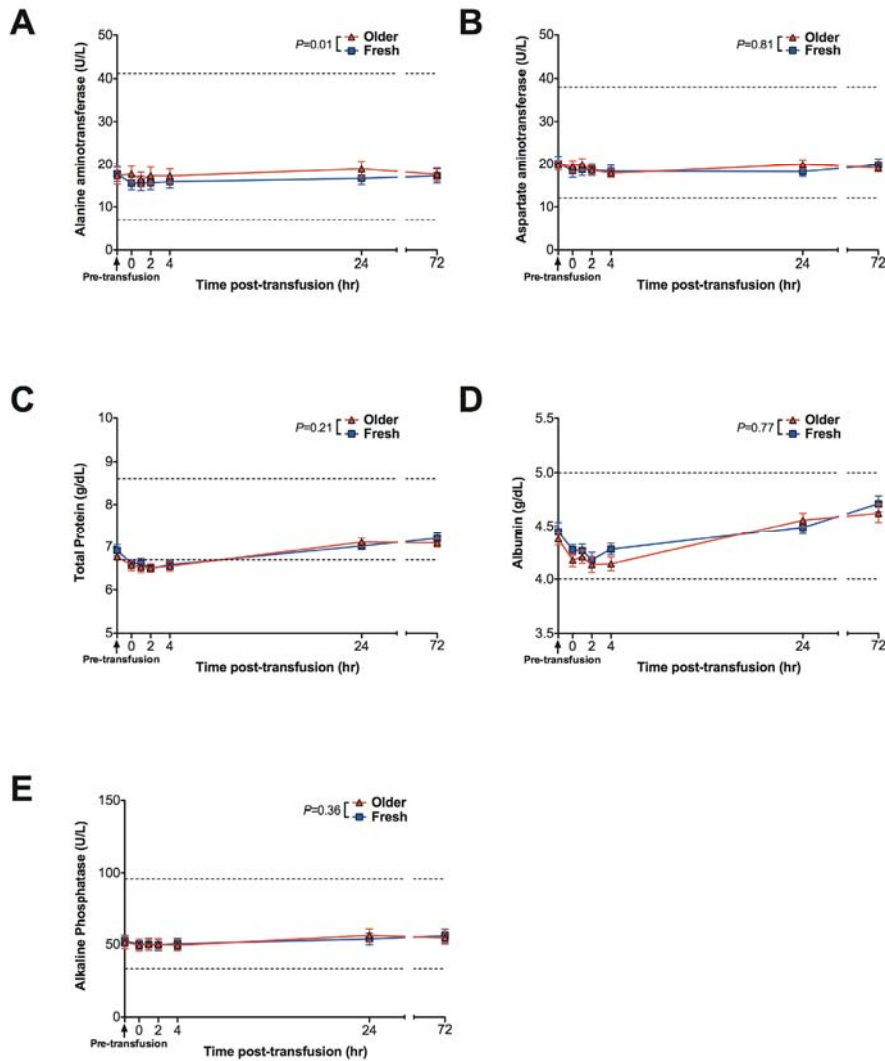

**Figure S3. Liver function parameters in healthy human volunteers after single unit transfusions of fresh or older red blood cells**

The mean  $\pm$  SEM for serum (A) alanine aminotransferase, (B) aspartate aminotransferase, (C) total protein, (D) albumin, and (E) alkaline phosphatase from pre-transfusion to 72-hours post-transfusion in volunteers transfused with either fresh or older red blood cells. Vertical arrows denote pre-transfusion time points and horizontal dashed lines represent reference range values. The *P* value is as specified comparing the paired area under the curve of the means of the outcome parameters for the N=14 volunteers from 0- to 24-hours after the fresh and older transfusions.
